# Supplementary material for: No Performance Benefit of Random Over Table-ordered Multiplication Training in Children: Does Memory Interference Between Facts Constrain Arithmetic Learning?
Source: Research Square preprint supplement (doi:10.21203/rs.3.rs-7139588/v1), 2025-07-29
Supplement: Supplementary file 1 [file ef1830b4ca820df332a665c2.docx]

**Appendix**

Fluency multiplication test used at pre- and post-test
